# Supplementary material
Source: Springer Nature journal article supplement (https://www.springermedizin.de/resource/supplementary/12889_2012_5415_MOESM2_ESM.pdf/9495112)

New Annual Cases

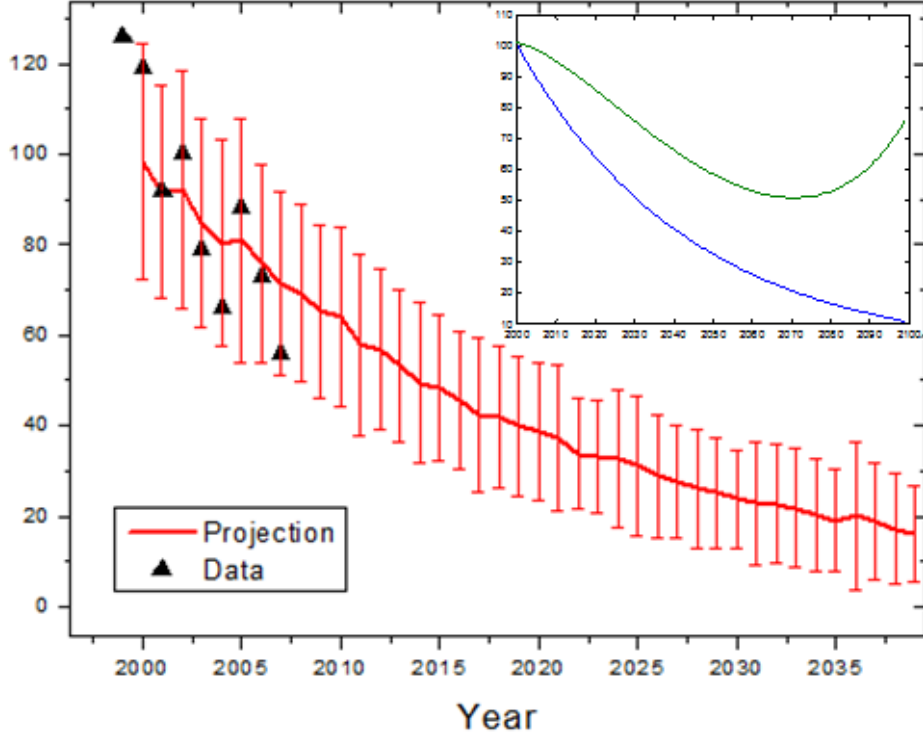

Supplement: MOESM2 [file 9495112]
